# Supplementary material for: A gradient screening approach for retired lithium-ion batteries based on X-ray computed tomography images
Source: Royal Society of Chemistry journal article supplement (doi:10.1039/d0ra03602a), 2020-01-01
Supplement: d0ra03602a1.pdf [file d0ra03602a1.pdf]

## A Gradient Screening Approach for Retired Lithium-ion Batteries Based on X-ray Computed Tomography Images

Aihua Ran <sup>a,b,#</sup>, Shuxiao Chen <sup>a,b,#</sup>, Siwei Zhang<sup>a,b</sup>, Siyang Liu <sup>a,b</sup>, Zihao Zhou <sup>a,b</sup>, Pengbo Nie <sup>a,b</sup>, Kun Qian <sup>a,b</sup>, Lu Fang <sup>a,b</sup>, Shi-Xi Zhao <sup>b</sup>, Baohua Li <sup>b</sup>, Feiyu Kang <sup>a,b</sup>, Xiang Zhou<sup>c</sup>, Hongbin Sun<sup>d</sup>, Xuan Zhang <sup>a,b,\*</sup> and Guodan Wei <sup>a,b,\*</sup>

<sup>a</sup>*Tsinghua-Berkeley Shenzhen Institute (TBSI), Tsinghua University, Shenzhen, 518055, China*

<sup>b</sup>*Tsinghua Shenzhen International Graduate School, Tsinghua University, Shenzhen, 518055, China*

<sup>c</sup>*School of Data Science and Department of Mathematics, City University of Hong Kong, Tat Chee Avenue, Kowloon, Hong Kong SAR, China*

<sup>d</sup>*Department of Electrical Engineering, Tsinghua University, Beijing, China*

Emal: G.D. ([weiguodan@sz.tsinghua.edu.cn](mailto:weiguodan@sz.tsinghua.edu.cn)) and X.Z. ([xuanzhang@sz.tsinghua.edu.cn](mailto:xuanzhang@sz.tsinghua.edu.cn))

# These two authors are equally contributed to this work.

### Supporting Figures and Tables

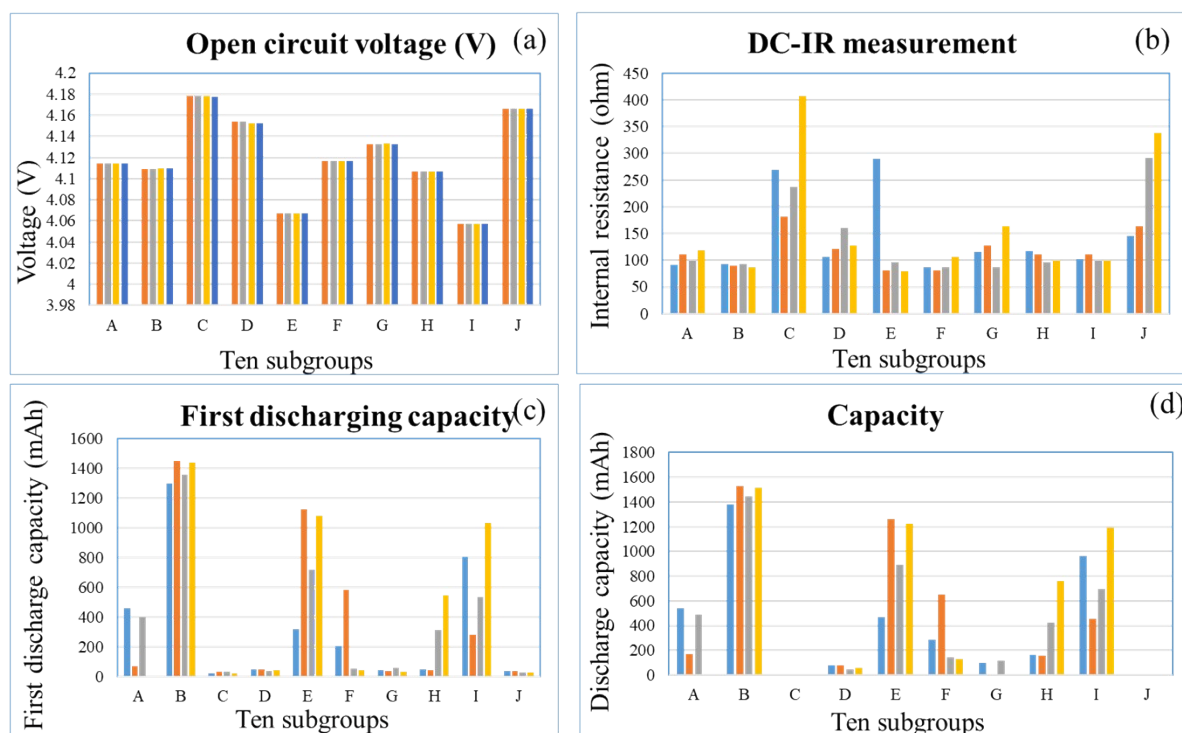

Fig.S1 Electrochemical performance of 40 unpacked cells: (a) the OCV, (b) the internal resistance, (c) first discharge capacity (d) the capacity.

| Grating                         | 1            | 2              | 3              |
|---------------------------------|--------------|----------------|----------------|
| Voltage (V)                     | A、B、F、G、H    | E、I            | C、D、J          |
| <b>DC-IR</b>                    | <b>B、E</b>   | <b>A、F、H、I</b> | <b>C、D、G、J</b> |
| First discharge capacity (mAh)  | B、E、I        | A、F、H          | C、D、G、J        |
| <b>Discharge capacity (mAh)</b> | <b>B、E、I</b> | <b>A、F、H</b>   | <b>C、D、G、J</b> |

Table S1: Screening results of ten subgroups for retired lithium ion battery. Group B and E is sorted in the same collection with better electrochemical performance compared to the rest.

| Capacity (mAh) | Numbers |
|----------------|---------|
| 0~600          | 31      |
| 600~1000       | 2       |
| 1000~1200      | 3       |
| 1200~1400      | 2       |
| 1400~1600      | 2       |

Table S2: Capacity grating results of forty retired batteries. The battery can be reused only when the capacity is above 1000 mAh.
